# Supplementary material
Source: publisher figshare collection journal article supplement (https://frontiersin.figshare.com/ndownloader/files/13084217)
Supplement: Supplementary file [file 13084217]

## *Supplementary Material*

### **Context-sensitivity and Individual Differences in the Derivation of Scalar Implicature**

**Xiao Yang\***, Utako Minai, Robert Fiorentino

\* **Correspondence:** Xiao Yang: xiaoyang@ku.edu

Supplementary Tables

Table 4: Pairwise correlations (2-tailed) of the composite scores of individual difference measures.  $p$  values are included in the brackets.

|                           | Cognitive Resources  | Socio-pragmatic Abilities |
|---------------------------|----------------------|---------------------------|
| Socio-pragmatic Abilities | -.075 ( $p = .555$ ) |                           |
| Language Skills           | -.008 ( $p = .949$ ) | .033 ( $p = .797$ )       |
